# Supplementary material for: Prognostic Value of the Hemoglobin/Red Cell Distribution Width Ratio in Resected Lung Adenocarcinoma
Source: PubMed Central journal article supplement (PMC7916257; doi:10.3390/cancers13040710), 2021-02-09
Supplement: cancers-13-00710-s001.pdf [file cancers-13-00710-s001.pdf]

**Table S1.** All multivariable subdistribution Hazard Ratios (sHR) for treatment adjusted Disease Free Survival

| Risk Factor at Surgery   |                            | sHR (95% CI)                   |
|--------------------------|----------------------------|--------------------------------|
| Tumor Size               |                            | 1.18 <sup>a</sup> (0.99 -1.40) |
| HRR Median cut-off       | ≥ 1.01                     | 1                              |
|                          | < 1.01                     | 2.20 (1.30-3.72)               |
|                          | < 1.01                     | 1                              |
|                          | ≥ 1.01                     | 0.46 (0.27-0.77)               |
| pN                       | N0 vs N1 multiple          | 0.11 (0.04-0.27)               |
|                          | N1 multiple vs N0          | 9.16 (3.65-23.0)               |
|                          | N0 vs N1 single            | 0.39 (0.20-0.75)               |
|                          | N1 single vs N0            | 2.55 (1.33-4.90)               |
|                          | N0 vs N2 multiple          | 0.10 (0.03-0.29)               |
|                          | N2 multiple vs N0          | 10.5 (3.43-32.2)               |
|                          | N0 vs N2 single            | 0.44 (0.16-1.20)               |
|                          | N2 single vs N0            | 2.29 (0.83-6.33)               |
|                          | N1 multiple vs N1 single   | 3.59 (1.38-9.35)               |
|                          | N1 single vs N1 multiple   | 0.28 (0.11-0.72)               |
|                          | N1 multiple vs N2 multiple | 0.87 (0.27-2.81)               |
|                          | N2 multiple vs N1 multiple | 1.15 (0.36-3.70)               |
|                          | N2 multiple vs N2 single   | 4.00 (1.39-11.5)               |
|                          | N2 single vs N1 multiple   | 0.25 (0.09-0.72)               |
|                          | N1 single vs N2 multiple   | 0.24 (0.08-0.74)               |
|                          | N2 multiple vs N1 single   | 4.13 (1.35-12.7)               |
|                          | N1 single vs N2 single     | 1.11 (0.42-2.98)               |
|                          | N2 single vs N1 single     | 0.90 (0.34-2.41)               |
| N2 multiple vs N2 single | 4.59 (1.52-13.8)           |                                |
| N2 single vs N2 multiple | 0.22 (0.07-0.66)           |                                |

<sup>a</sup> by 10 mm units increase; Median Follow-up = 13 months
